# Supplementary material for: Identification and Purification of Novel Low-Molecular-Weight Lupine Allergens as Components for Personalized Diagnostics
Source: PubMed Central journal article supplement (PMC7911308; doi:10.3390/nu13020409), 2021-01-28
Supplement: nutrients-13-00409-s001.pdf [file nutrients-13-00409-s001.pdf]

**Figure S 1 A-E**

| <b>A. Nucleotide and protein sequence from database entry FG090100</b>                                                                                                                                                                                                                                                                                                                                                                                                                                                                                                                                                                                                                                                                                                                                                                                                                                                                                                                                                                                                                                                                                                                                                                                                                                                          |                                                        |
|---------------------------------------------------------------------------------------------------------------------------------------------------------------------------------------------------------------------------------------------------------------------------------------------------------------------------------------------------------------------------------------------------------------------------------------------------------------------------------------------------------------------------------------------------------------------------------------------------------------------------------------------------------------------------------------------------------------------------------------------------------------------------------------------------------------------------------------------------------------------------------------------------------------------------------------------------------------------------------------------------------------------------------------------------------------------------------------------------------------------------------------------------------------------------------------------------------------------------------------------------------------------------------------------------------------------------------|--------------------------------------------------------|
| Accession number                                                                                                                                                                                                                                                                                                                                                                                                                                                                                                                                                                                                                                                                                                                                                                                                                                                                                                                                                                                                                                                                                                                                                                                                                                                                                                                | <b>FG090100</b> (EST database), for sequence see below |
| <pre> g ggg ata tca ctc act ctc tat ctc ttt ctc tca tag att ttc att tca aag cta G I S L T L Y L F L S - I F I S K L agt ttg aga aaa atg <b>tcg tgg caa acc tac gtt gat gag cac ctt ttg tgc gat</b> S L R K M <b>S W Q T Y V D E H L L C D</b> <b>atc gaa ggt aat cag ctc act tct gca gcc att atc ggc caa gac ggt agc gtt</b> <b>I E G N Q L T S A A I I G Q D G S V</b> <b>tgg gct cag agc tct tct ttc cct cag ttc aag cct gag gaa ata act gct atc</b> <b>W A Q S S S F P Q F K P E E I T A I</b> <b>gtg aat gac ttt gct gag cct gga tca ctt gct cca act gga tta tat ctc ggt</b> <b>V N D F A E P G S L A P T G L Y L G</b> <b>ggc acg aaa tat atg gtg atc caa ggt gag cca gga gct gtc att cga ggg aaa</b> <b>G T K Y M V I Q G E P G A V I R G K</b> <b>aag ggt cct ggt ggg gtt act gtt aag aag acc aat caa gct ttg atc att ggt</b> <b>K G P G G V T V K K T N Q A L I I G</b> <b>att tat gat gaa cca atg act cca ggc caa tgc aac gtg gta gtt gaa agg ctt</b> <b>I Y D E P M T P G Q C N V V V E R L</b> <b>ggt gat tat ctc att gat acc ggt ctt</b> taa tcc tct tgg taa ttc ttg tta tcg <b>G D Y L I D T G L</b> - S S W - F L L S ttc tta ttt cat tgg ctt tta taa gag gct ttt aca tca act tgc cat gag aat F L F H W L L - E A F T S T C H E N tct tga ttg caa tgt aat aat att atg gct at S - L Q C N N I M A           </pre> |                                                        |

| <b>B. Nucleotide and protein sequence used for expression</b>                                                                                                                                                                                                                                                                                                                                                                                                                                                                                                                                                                                                                                                                                                                                                                                                                                                                                                                                  |                                                                  |
|------------------------------------------------------------------------------------------------------------------------------------------------------------------------------------------------------------------------------------------------------------------------------------------------------------------------------------------------------------------------------------------------------------------------------------------------------------------------------------------------------------------------------------------------------------------------------------------------------------------------------------------------------------------------------------------------------------------------------------------------------------------------------------------------------------------------------------------------------------------------------------------------------------------------------------------------------------------------------------------------|------------------------------------------------------------------|
| <pre>           <b>cat atg tcg tgg caa acc tac gtt gat gag cac ctt ttg tgc gat</b>           <b>H M S W Q T Y V D E H L L C D</b> <b>atc gaa ggt aat cag ctc act tct gca gcc att atc ggc caa gac ggt agc gtt</b> <b>I E G N Q L T S A A I I G Q D G S V</b> <b>tgg gct cag agc tct tct ttc cct cag ttc aag cct gag gaa ata act gct atc</b> <b>W A Q S S S F P Q F K P E E I T A I</b> <b>gtg aat gac ttt gct gag cct gga tca ctt gct cca act gga tta tat ctc ggt</b> <b>V N D F A E P G S L A P T G L Y L G</b> <b>ggc acg aaa tat atg gtg atc caa ggt gag cca gga gct gtc att cga ggg aaa</b> <b>G T K Y M V I Q G E P G A V I R G K</b> <b>aag ggt cct ggt ggg gtt act gtt aag aag acc aat caa gct ttg atc att ggt</b> <b>K G P G G V T V K K T N Q A L I I G</b> <b>att tat gat gaa cca atg act cca ggc caa tgc aac gtg gta gtt gaa agg ctt</b> <b>I Y D E P M T P G Q C N V V V E R L</b> <b>ggt gat tat ctc att gat acc ggt ctt ctc gag</b> <b>G D Y L I D T G L L E</b>           </pre> |                                                                  |
| Cleavage sites:                                                                                                                                                                                                                                                                                                                                                                                                                                                                                                                                                                                                                                                                                                                                                                                                                                                                                                                                                                                | NdeI (cat atg); marked in blue<br>XhoI (ctc gag); marked in blue |
| Expression system:                                                                                                                                                                                                                                                                                                                                                                                                                                                                                                                                                                                                                                                                                                                                                                                                                                                                                                                                                                             | Expression system: <i>E. coli</i> BL21(DE3),<br>Vector: pET-23b  |

| <b>C. Final protein sequence (after expression)</b> |                                                                                                                                                                                    |
|-----------------------------------------------------|------------------------------------------------------------------------------------------------------------------------------------------------------------------------------------|
| Incl. His-Tag (black)                               | <b>SWQTYVDEHLLCDIEGNQLTSAAIIGQDGSVWAQSSSFPPQFKPEEITAIVNDFAE<br/>           PGLAPTGLYLGGTKYMVIQGEPGA VIRGKKGPGGVTVKKTNQALIIGIYDEPMT<br/>           PGQCNVVVERLGDYLIDTGLLEHHHHHH</b> |

| <b>D. Molecular weight of the expressed protein</b> |                              |
|-----------------------------------------------------|------------------------------|
| Deduced from sequence                               | 13.849 kDa (without His-Tag) |
| SDS-PAGE (reduced)                                  | 15 kDa (with His-Tag)        |

| <b>E. N-terminal sequencing</b> |                                                                                                                                                                                    |
|---------------------------------|------------------------------------------------------------------------------------------------------------------------------------------------------------------------------------|
| sequence coverage (bold) :      | <b>SWQTYVDEHLLCDIEGNQLTSAAIIGQDGSVWAQSSSFPPQFKPEEITAIVNDFAE<br/>           PGLAPTGLYLGGTKYMVIQGEPGA VIRGKKGPGGVTVKKTNQALIIGIYDEPMT<br/>           PGQCNVVVERLGDYLIDTGLLEHHHHHH</b> |

**Figure S 1 A-E.** Identification of the sequence information on *L. albus* (A) available from the EST data base, (B) sequence used for recombinant expression of the authentic protein and (C-E) preparation for mass spectrometry analysis

Figure S 2 A-E

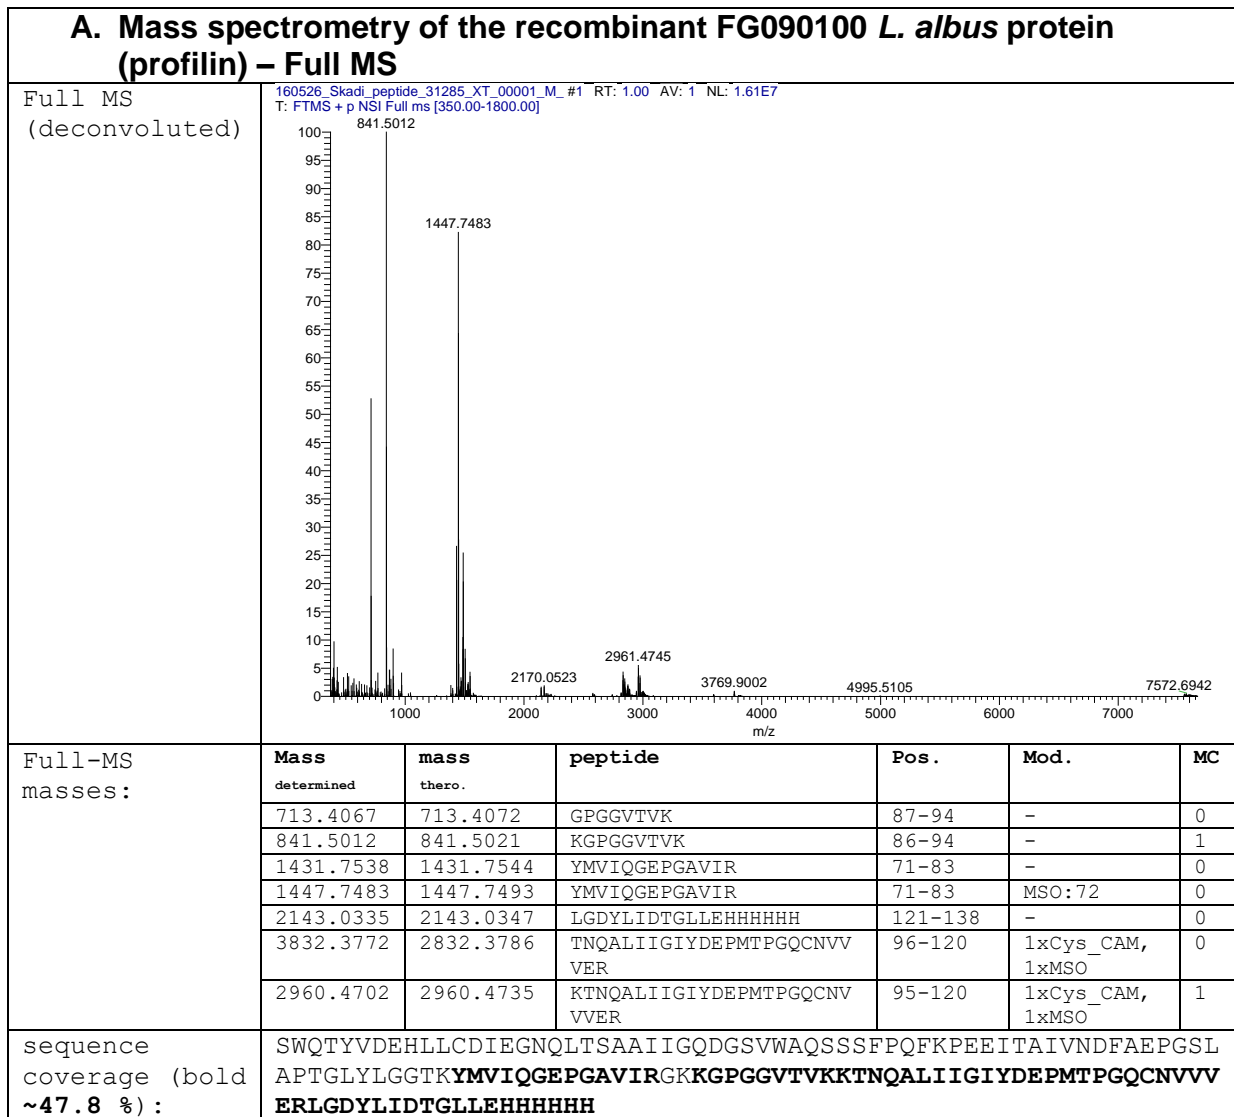

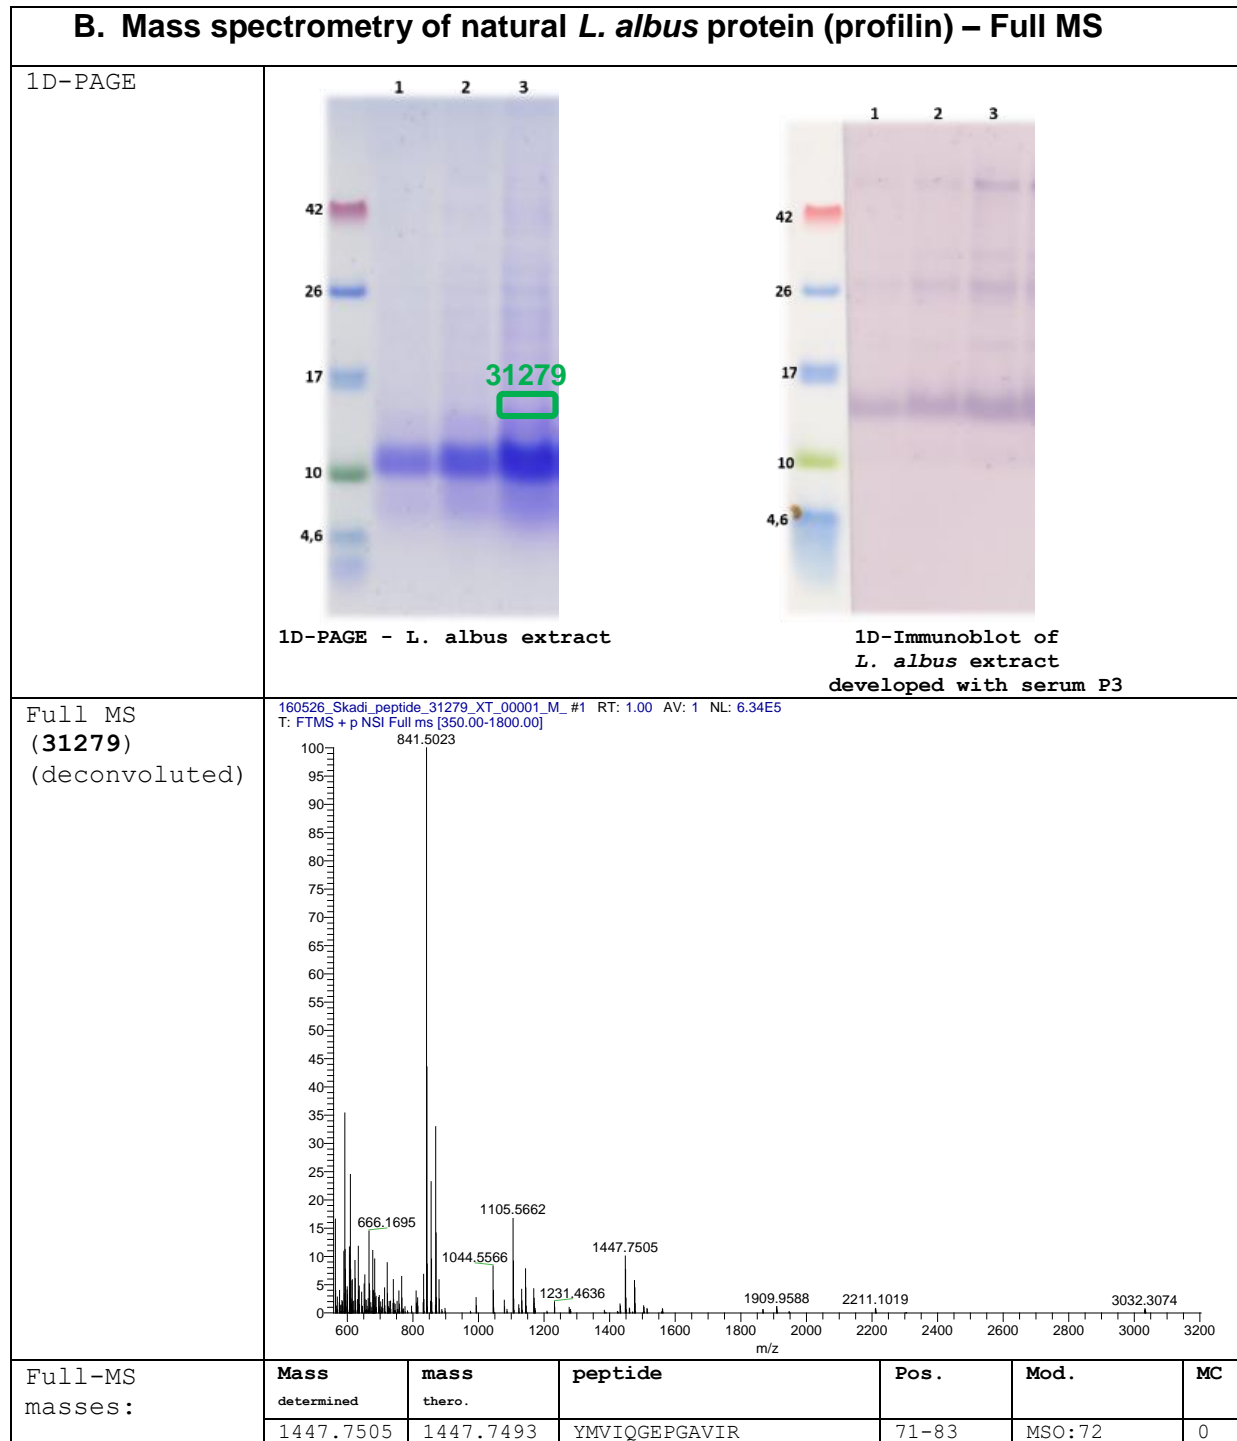

### C. Mass spectrometry of natural *L. albus* protein (profilin) – MS/MS

| MS/MS of fragment                                                   | <b>YMVIQGEPGA VIR</b>                                                                                                                                                                                                                                                                                                                                                                                                                                                                                                                                                                                                                                                                                                                                                                                                                                                                                                                                                             |                       |                   |            |     |     |          |     |           |                      |           |           |          |           |           |          |          |          |          |          |          |          |          |          |          |          |          |          |          |          |          |          |          |          |          |          |          |          |          |          |          |          |          |  |  |
|---------------------------------------------------------------------|-----------------------------------------------------------------------------------------------------------------------------------------------------------------------------------------------------------------------------------------------------------------------------------------------------------------------------------------------------------------------------------------------------------------------------------------------------------------------------------------------------------------------------------------------------------------------------------------------------------------------------------------------------------------------------------------------------------------------------------------------------------------------------------------------------------------------------------------------------------------------------------------------------------------------------------------------------------------------------------|-----------------------|-------------------|------------|-----|-----|----------|-----|-----------|----------------------|-----------|-----------|----------|-----------|-----------|----------|----------|----------|----------|----------|----------|----------|----------|----------|----------|----------|----------|----------|----------|----------|----------|----------|----------|----------|----------|----------|----------|----------|----------|----------|----------|----------|----------|--|--|
| MS/MS spectrum<br><b>31279</b> of m/z<br>724.88 [M+H] <sup>2+</sup> | <p>160526_Skadi_peptide_31279 #51 RT: 0.69 AV: 1 NL: 8.97E4<br/>         T: FTMS + p NSI d Full ms2 724.88@hcd30.00 [99.67-1495.00]</p> 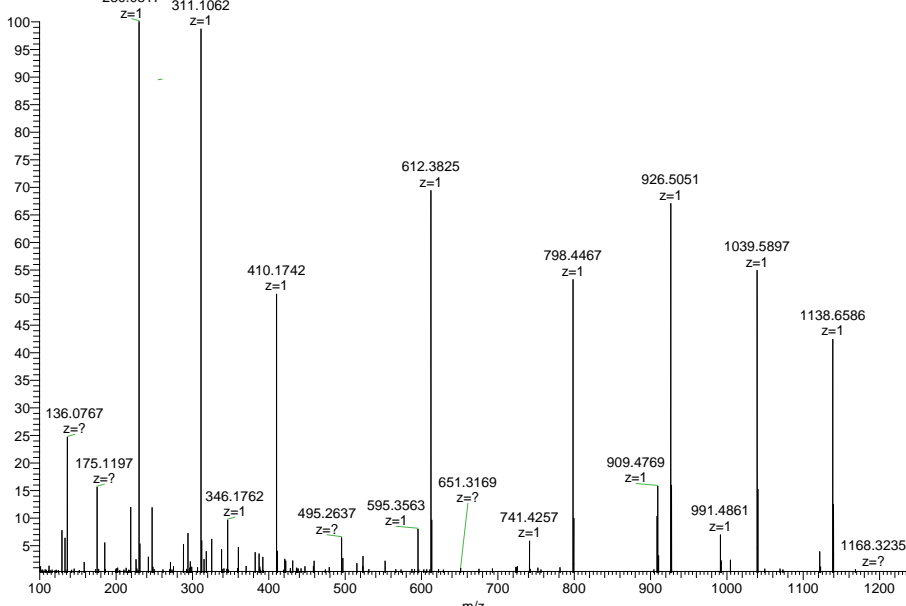                                                                                                                                                                                                                                                                                                                                                                                                                                                                                                                                                                                                                                                                                                                                                       |                       |                   |            |     |     |          |     |           |                      |           |           |          |           |           |          |          |          |          |          |          |          |          |          |          |          |          |          |          |          |          |          |          |          |          |          |          |          |          |          |          |          |          |  |  |
| MS/MS masses<br>m/z 724.88<br>[M+H] <sup>2+</sup> :                 | <table border="1"> <thead> <tr> <th>Mass y-ion determined</th> <th>Mass y-ion thero.</th> <th>Amino acid</th> </tr> </thead> <tbody> <tr><td>---</td><td>---</td><td><b>Y</b></td></tr> <tr><td>---</td><td>1285.6933</td><td><b>M (oxidation)</b></td></tr> <tr><td>1138.6586</td><td>1138.6579</td><td><b>V</b></td></tr> <tr><td>1039.5897</td><td>1039.5895</td><td><b>I</b></td></tr> <tr><td>926.5051</td><td>926.5054</td><td><b>Q</b></td></tr> <tr><td>798.4467</td><td>798.4468</td><td><b>G</b></td></tr> <tr><td>741.4257</td><td>741.4254</td><td><b>E</b></td></tr> <tr><td>612.3825</td><td>612.3828</td><td><b>P</b></td></tr> <tr><td>515.3312</td><td>515.3300</td><td><b>G</b></td></tr> <tr><td>458.3088</td><td>458.3085</td><td><b>A</b></td></tr> <tr><td>387.2711</td><td>387.2714</td><td><b>V</b></td></tr> <tr><td>288.2032</td><td>288.2030</td><td><b>I</b></td></tr> <tr><td>175.1197</td><td>175.1190</td><td><b>R</b></td></tr> </tbody> </table> | Mass y-ion determined | Mass y-ion thero. | Amino acid | --- | --- | <b>Y</b> | --- | 1285.6933 | <b>M (oxidation)</b> | 1138.6586 | 1138.6579 | <b>V</b> | 1039.5897 | 1039.5895 | <b>I</b> | 926.5051 | 926.5054 | <b>Q</b> | 798.4467 | 798.4468 | <b>G</b> | 741.4257 | 741.4254 | <b>E</b> | 612.3825 | 612.3828 | <b>P</b> | 515.3312 | 515.3300 | <b>G</b> | 458.3088 | 458.3085 | <b>A</b> | 387.2711 | 387.2714 | <b>V</b> | 288.2032 | 288.2030 | <b>I</b> | 175.1197 | 175.1190 | <b>R</b> |  |  |
| Mass y-ion determined                                               | Mass y-ion thero.                                                                                                                                                                                                                                                                                                                                                                                                                                                                                                                                                                                                                                                                                                                                                                                                                                                                                                                                                                 | Amino acid            |                   |            |     |     |          |     |           |                      |           |           |          |           |           |          |          |          |          |          |          |          |          |          |          |          |          |          |          |          |          |          |          |          |          |          |          |          |          |          |          |          |          |  |  |
| ---                                                                 | ---                                                                                                                                                                                                                                                                                                                                                                                                                                                                                                                                                                                                                                                                                                                                                                                                                                                                                                                                                                               | <b>Y</b>              |                   |            |     |     |          |     |           |                      |           |           |          |           |           |          |          |          |          |          |          |          |          |          |          |          |          |          |          |          |          |          |          |          |          |          |          |          |          |          |          |          |          |  |  |
| ---                                                                 | 1285.6933                                                                                                                                                                                                                                                                                                                                                                                                                                                                                                                                                                                                                                                                                                                                                                                                                                                                                                                                                                         | <b>M (oxidation)</b>  |                   |            |     |     |          |     |           |                      |           |           |          |           |           |          |          |          |          |          |          |          |          |          |          |          |          |          |          |          |          |          |          |          |          |          |          |          |          |          |          |          |          |  |  |
| 1138.6586                                                           | 1138.6579                                                                                                                                                                                                                                                                                                                                                                                                                                                                                                                                                                                                                                                                                                                                                                                                                                                                                                                                                                         | <b>V</b>              |                   |            |     |     |          |     |           |                      |           |           |          |           |           |          |          |          |          |          |          |          |          |          |          |          |          |          |          |          |          |          |          |          |          |          |          |          |          |          |          |          |          |  |  |
| 1039.5897                                                           | 1039.5895                                                                                                                                                                                                                                                                                                                                                                                                                                                                                                                                                                                                                                                                                                                                                                                                                                                                                                                                                                         | <b>I</b>              |                   |            |     |     |          |     |           |                      |           |           |          |           |           |          |          |          |          |          |          |          |          |          |          |          |          |          |          |          |          |          |          |          |          |          |          |          |          |          |          |          |          |  |  |
| 926.5051                                                            | 926.5054                                                                                                                                                                                                                                                                                                                                                                                                                                                                                                                                                                                                                                                                                                                                                                                                                                                                                                                                                                          | <b>Q</b>              |                   |            |     |     |          |     |           |                      |           |           |          |           |           |          |          |          |          |          |          |          |          |          |          |          |          |          |          |          |          |          |          |          |          |          |          |          |          |          |          |          |          |  |  |
| 798.4467                                                            | 798.4468                                                                                                                                                                                                                                                                                                                                                                                                                                                                                                                                                                                                                                                                                                                                                                                                                                                                                                                                                                          | <b>G</b>              |                   |            |     |     |          |     |           |                      |           |           |          |           |           |          |          |          |          |          |          |          |          |          |          |          |          |          |          |          |          |          |          |          |          |          |          |          |          |          |          |          |          |  |  |
| 741.4257                                                            | 741.4254                                                                                                                                                                                                                                                                                                                                                                                                                                                                                                                                                                                                                                                                                                                                                                                                                                                                                                                                                                          | <b>E</b>              |                   |            |     |     |          |     |           |                      |           |           |          |           |           |          |          |          |          |          |          |          |          |          |          |          |          |          |          |          |          |          |          |          |          |          |          |          |          |          |          |          |          |  |  |
| 612.3825                                                            | 612.3828                                                                                                                                                                                                                                                                                                                                                                                                                                                                                                                                                                                                                                                                                                                                                                                                                                                                                                                                                                          | <b>P</b>              |                   |            |     |     |          |     |           |                      |           |           |          |           |           |          |          |          |          |          |          |          |          |          |          |          |          |          |          |          |          |          |          |          |          |          |          |          |          |          |          |          |          |  |  |
| 515.3312                                                            | 515.3300                                                                                                                                                                                                                                                                                                                                                                                                                                                                                                                                                                                                                                                                                                                                                                                                                                                                                                                                                                          | <b>G</b>              |                   |            |     |     |          |     |           |                      |           |           |          |           |           |          |          |          |          |          |          |          |          |          |          |          |          |          |          |          |          |          |          |          |          |          |          |          |          |          |          |          |          |  |  |
| 458.3088                                                            | 458.3085                                                                                                                                                                                                                                                                                                                                                                                                                                                                                                                                                                                                                                                                                                                                                                                                                                                                                                                                                                          | <b>A</b>              |                   |            |     |     |          |     |           |                      |           |           |          |           |           |          |          |          |          |          |          |          |          |          |          |          |          |          |          |          |          |          |          |          |          |          |          |          |          |          |          |          |          |  |  |
| 387.2711                                                            | 387.2714                                                                                                                                                                                                                                                                                                                                                                                                                                                                                                                                                                                                                                                                                                                                                                                                                                                                                                                                                                          | <b>V</b>              |                   |            |     |     |          |     |           |                      |           |           |          |           |           |          |          |          |          |          |          |          |          |          |          |          |          |          |          |          |          |          |          |          |          |          |          |          |          |          |          |          |          |  |  |
| 288.2032                                                            | 288.2030                                                                                                                                                                                                                                                                                                                                                                                                                                                                                                                                                                                                                                                                                                                                                                                                                                                                                                                                                                          | <b>I</b>              |                   |            |     |     |          |     |           |                      |           |           |          |           |           |          |          |          |          |          |          |          |          |          |          |          |          |          |          |          |          |          |          |          |          |          |          |          |          |          |          |          |          |  |  |
| 175.1197                                                            | 175.1190                                                                                                                                                                                                                                                                                                                                                                                                                                                                                                                                                                                                                                                                                                                                                                                                                                                                                                                                                                          | <b>R</b>              |                   |            |     |     |          |     |           |                      |           |           |          |           |           |          |          |          |          |          |          |          |          |          |          |          |          |          |          |          |          |          |          |          |          |          |          |          |          |          |          |          |          |  |  |

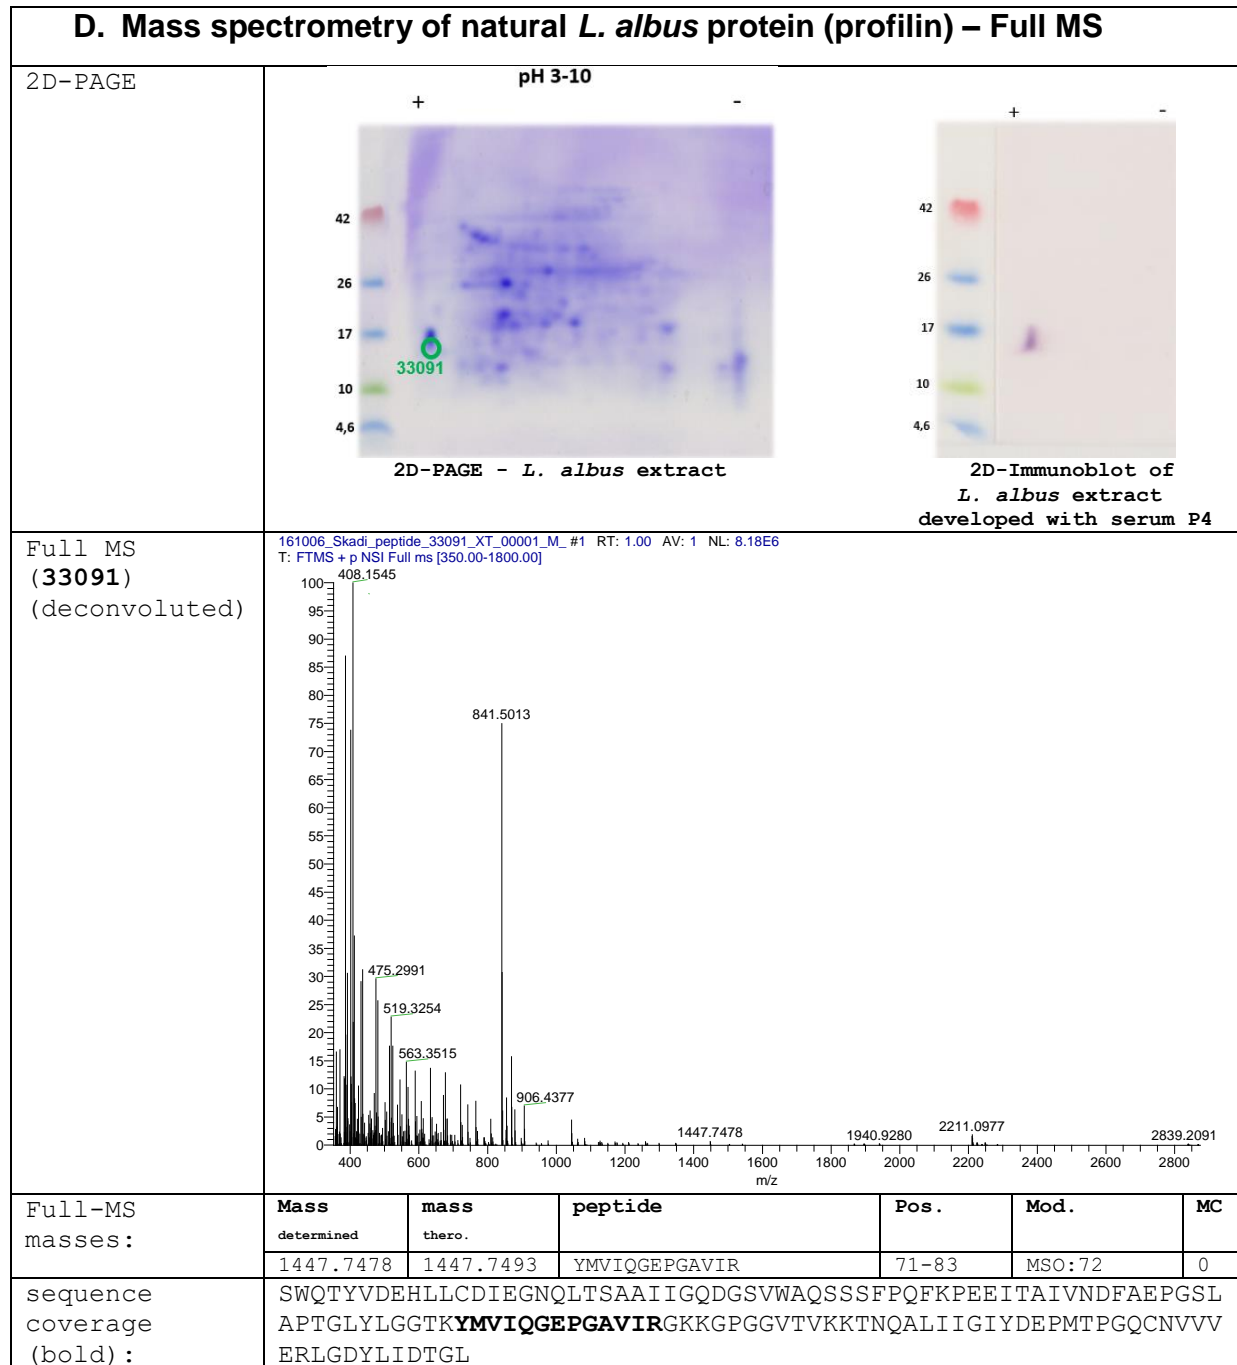

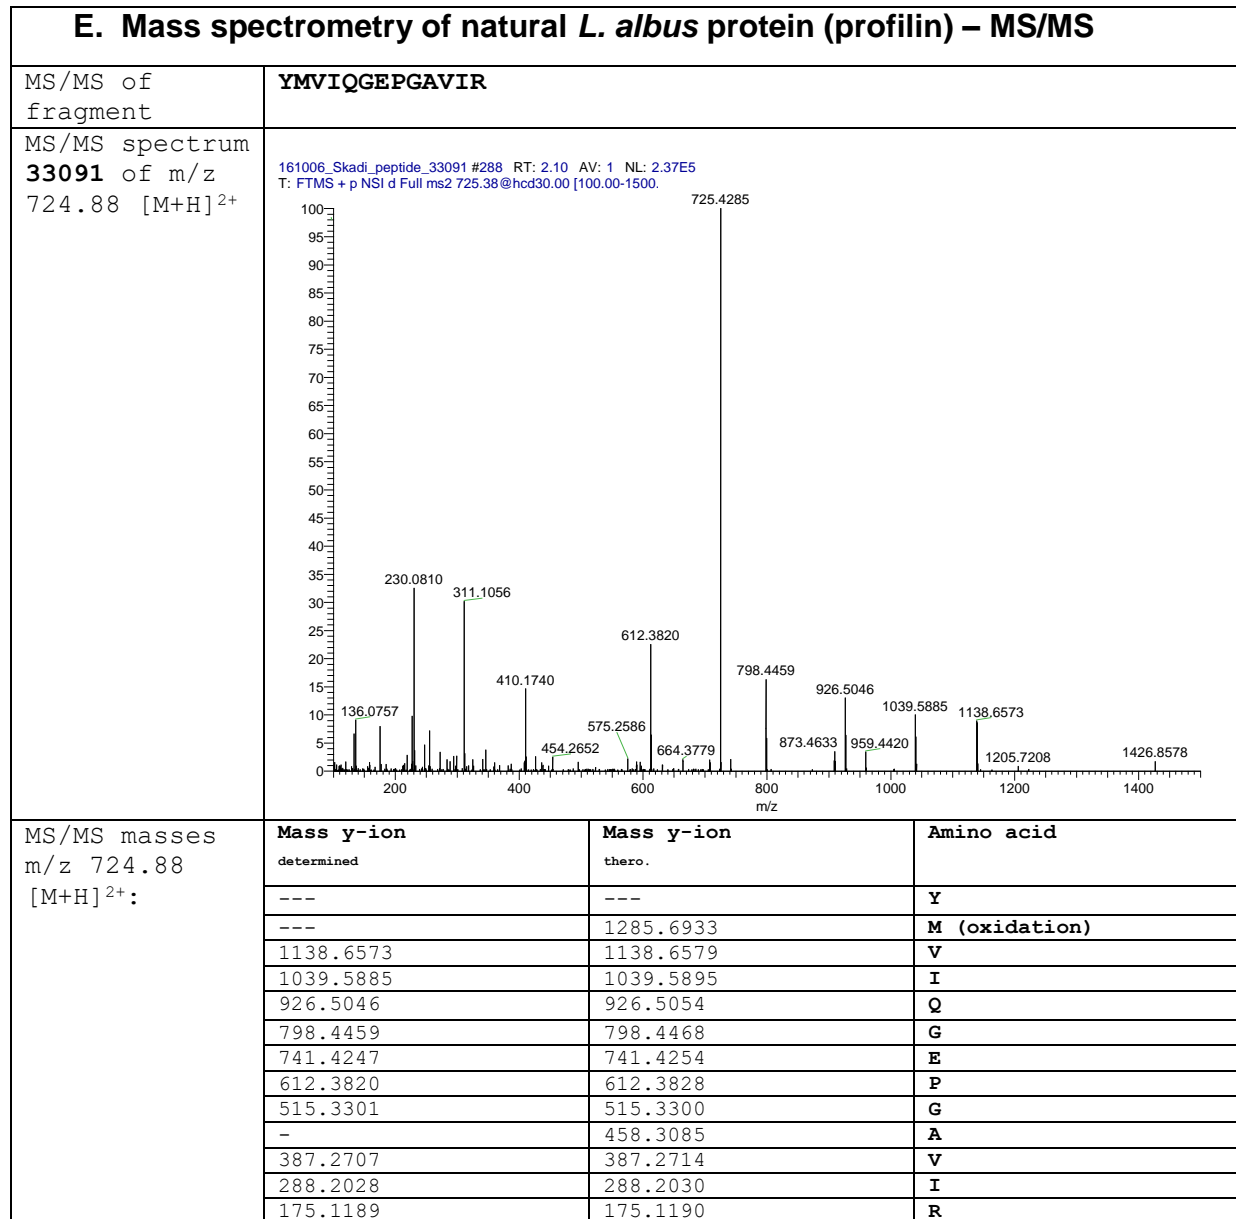

As submitted to the WHO/IUIS allergen nomenclature sub-committee, 2016

**Figure S 2 A-E.** Synopsis of the mass spectrometry analyses of *L. albus* recombinant profilin and the *L. albus* profilin purified from the natural source.

Figure S 3 A-D

**A. Database protein sequence (XP\_019446786.1)**

**PREDICTED: non-specific lipid-transfer protein 1-like [Lupinus angustifolius]**

NCBI Reference Sequence: XP\_019446786.1  
[Identical Proteins](#) [FASTA](#) [Graphics](#)

---

[Go to:](#)

LOCUS XP\_019446786 116 aa linear PLN 16-DEC-2016  
DEFINITION PREDICTED: non-specific lipid-transfer protein 1-like [Lupinus angustifolius].  
ACCESSION XP\_019446786  
VERSION XP\_019446786.1  
DBLINK BioProject: [PRJNA356456](#)  
DBSOURCE REFSEQ: accession [XM\\_019591241.1](#)  
KEYWORDS RefSeq.  
SOURCE Lupinus angustifolius (narrow-leaved blue lupine)  
ORGANISM [Lupinus angustifolius](#)  
Eukaryota; Viridiplantae; Streptophyta; Embryophyta; Tracheophyta; Spermatophyta; Magnoliophyta; eudicotyledons; Gunneridae; Pentapetalae; rosids; fabids; Fabales; Fabaceae; Papilionoideae; Genisteae; Lupinus.  
COMMENT MODEL [REFSEQ](#): This record is predicted by automated computational analysis. This record is derived from a genomic sequence ([NC\\_032009.1](#)) annotated using gene prediction method: Gnomon.  
Also see: [Documentation](#) of NCBI's Annotation Process

##Genome-Annotation-Data-START##  
Annotation Provider :: NCBI  
Annotation Status :: Full annotation  
Annotation Version :: [Lupinus angustifolius Annotation Release 100](#)  
Annotation Pipeline :: NCBI eukaryotic genome annotation pipeline  
Annotation Software Version :: [7.2](#)  
Annotation Method :: Best-placed RefSeq; Gnomon  
Features Annotated :: Gene; mRNA; CDS; ncRNA  
##Genome-Annotation-Data-END##  
COMPLETENESS: full length.

FEATURES Location/Qualifiers  
source 1..116  
/organism="Lupinus angustifolius"  
/cultivar="Tanjil"  
/db\_xref="taxon:[3871](#)"  
/chromosome="LG01"  
/tissue\_type="whole plant"  
/dev\_stage="seedling"  
/country="Australia: Western Australia"  
[Protein](#) 1..116  
/product="non-specific lipid-transfer protein 1-like"  
/calculated\_mol\_wt=11589  
[CDS](#) 1..116  
/gene="LOC109350101"  
/coded\_by="XM\_019591241.1:78..428"  
/db\_xref="GeneID:[109350101](#)"

ORIGIN  
1 magivklaca vlicmvvsa pltkaitcgq vtanlaqcln ylrsggavpa pccngiknil  
61 nlakttppdr tacnclkaa antpglnpsn agslpgkcvv nipykistst ncasik  
//

---

>XP\_019446786.1 PREDICTED: non-specific lipid-transfer protein 1-like [Lupinus angustifolius]  
**MAGIVKLACAVLICMVVVSAPLTKAITCGQVTANLAQCLNLYLRSGGAVPAPCCNGIKNILNLAKTTPDRR**  
**TACNCLKAAAANTPGLNPSNAGSLPGKCVNIPYKISTSTNCASIK**  
Signal peptide, mature sequence



| <b>B. Molecular weight of the mature protein</b> |                                                                                                   |
|--------------------------------------------------|---------------------------------------------------------------------------------------------------|
| 1D-Page                                          | <p>SDS-PAGE of <i>L. angustifolius</i> LTP under reducing (R) and non-reducing (N) conditions</p> |
| Deduced from sequence                            | 9.23 kDa (monoisotopic mass)                                                                      |
| SDS-PAGE (reduced)                               | ~11.00 kDa                                                                                        |
| SDS-PAGE (non-reduced)                           | ~16.00 kDa                                                                                        |

| <b>C. N-terminal sequencing</b> |                                                                                                          |
|---------------------------------|----------------------------------------------------------------------------------------------------------|
| sequence coverage (bold) :13.2% | <b>ITCGQVTANLAQ</b> CLNYLRSGGAVPAPCCNGIKNILNLAKTTPDRRTACNCLKAAAANTP<br>GLNPSNAGSLPGKCGVNIPIYKISTSTNCASIK |

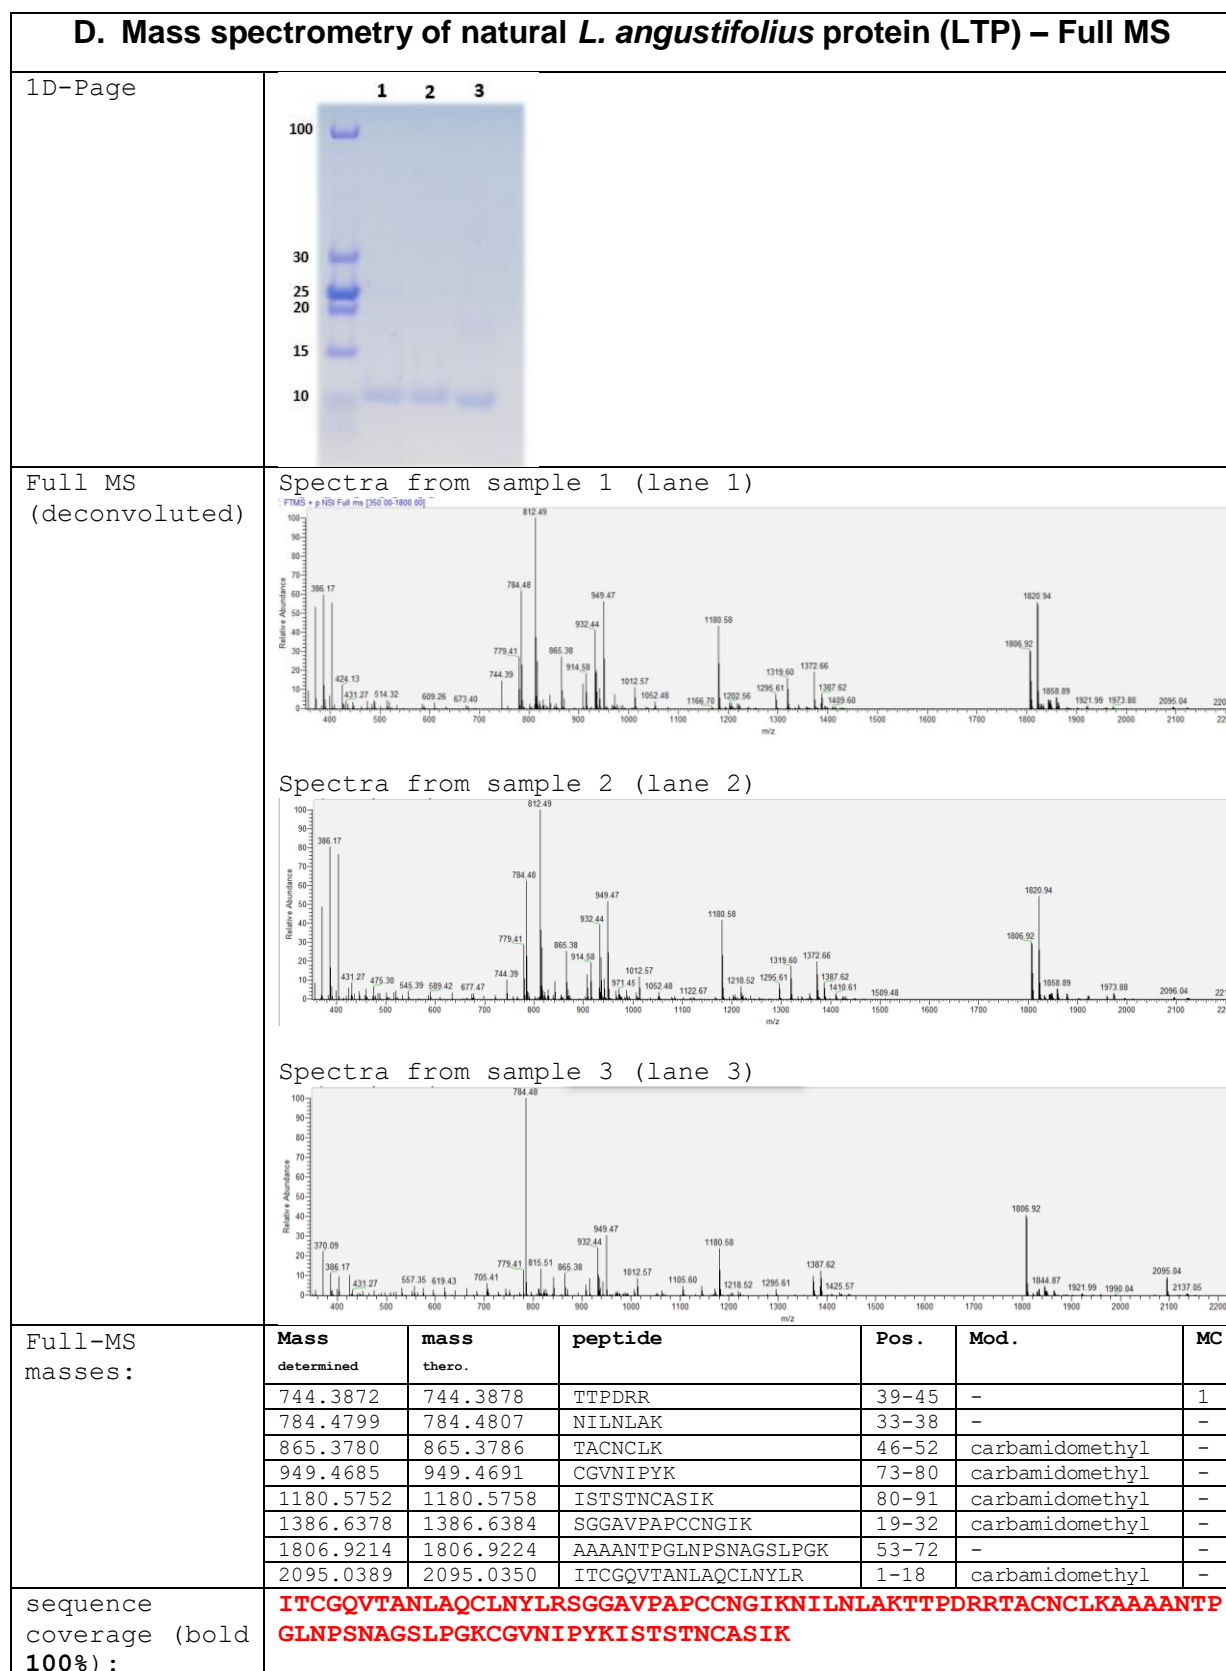

As submitted to the WHO/IUIS allergen nomenclature sub-committee, 25/09/2019.

**Figure S 3 A-D.** *Lupinus angustifolius* lipid transfer protein (LTP): (A) database protein sequence, (B) molecular weight determination of the mature protein (under reducing and non-reducing conditions), (C) N-terminal sequencing, and (D) mass spectrometry.
